# Supplementary material for: Fluorescent Bis-Calix[4]arene-Carbazole Conjugates: Synthesis and Inclusion Complexation Studies with Fullerenes C60 and C70
Source: MDPI journal article supplement (doi:10.3390/molecules26165000), 2021-08-18
Supplement: s1 [file s1]

## Article

# Fluorescent Bis-Calix[4]arene-Carbazole Conjugates: Synthesis and Inclusion Complexation Studies with Fullerenes C<sub>60</sub> and C<sub>70</sub>

Patrícia D. Barata <sup>1,2</sup>, Alexandra I. Costa <sup>1,2</sup>, Sérgio Costa <sup>1</sup>, José V. Prata <sup>1,2,\*</sup>

<sup>1</sup> Departamento de Engenharia Química, Instituto Superior de Engenharia de Lisboa, Instituto Politécnico de Lisboa, R. Conselheiro Emídio Navarro, 1, 1959-007 Lisboa, Portugal. acosta@deq.isel.ipl.pt (A.I.C.); pbarata@deq.isel.ipl.pt (P.D.B.); sethcosta@hotmail.com (S.C.)

<sup>2</sup> Centro de Química-Vila Real, Universidade de Trás-os-Montes e Alto Douro, 5001-801 Vila Real, Portugal

\* Correspondence: jvprata@deq.isel.ipl.pt (J.V.P.); Tel.: +351-218317172

## Supplementary Materials

### Table of Contents

Scheme S1. Synthesis of calix[4]arene-triisopropyl-mono-iodo derivative **1**.

Figure S1. <sup>1</sup>H NMR spectrum of bis-(*p*-H-calix-triisopropyl)-3,6-CBZ (**4**).

Figure S2. <sup>13</sup>C NMR spectrum of bis-(*p*-H-calix-triisopropyl)-3,6-CBZ (**4**).

Figure S3. <sup>13</sup>C DEPT 135 NMR spectrum of bis-(*p*-H-calix-triisopropyl)-3,6-CBZ (**4**).

Figure S4. <sup>1</sup>H-<sup>1</sup>H COSY NMR spectrum of bis-(*p*-H-calix-triisopropyl)-3,6-CBZ (**4**).

Figure S5. <sup>1</sup>H-<sup>13</sup>C HSQC NMR spectrum of bis-(*p*-H-calix-triisopropyl)-3,6-CBZ (**4**).

Figure S6. <sup>1</sup>H-<sup>13</sup>C HMBC NMR spectrum of bis-(*p*-H-calix-triisopropyl)-3,6-CBZ (**4**).

Figure S7. NOESY NMR spectrum of bis-(*p*-H-calix-triisopropyl)-3,6-CBZ (**4**).

Figure S8. <sup>1</sup>H NMR spectrum of bis-(*p*-H-calix-triisopropyl)-2,7-CBZ (**5**).

Figure S9. <sup>13</sup>C NMR (**a**) and <sup>13</sup>C DEPT 135 NMR (**b**) spectra of bis-(*p*-H-calix-triisopropyl)-2,7-CBZ (**5**).

Figure S10. <sup>1</sup>H-<sup>1</sup>H COSY NMR spectrum of bis-(*p*-H-calix-triisopropyl)-2,7-CBZ (**5**).

Figure S11. <sup>1</sup>H-<sup>13</sup>C HSQC NMR spectrum of bis-(*p*-H-calix-triisopropyl)-2,7-CBZ (**5**).

Figure S12. Full ESI-HRMS spectrum of bis-(*p*-H-calix-triisopropyl)-3,6-CBZ (**4**) (**a**); ESI-HRMS spectrum of the molecular ion region (**b**).

Figure S13. Full ESI-HRMS spectrum of bis-(*p*-H-calix-triisopropyl)-2,7-CBZ (**5**) (**a**); ESI-HRMS spectrum of the molecular ion region (**b**).

Figure S14. UV-Vis spectra of bis-(*p*-H-calix-triisopropyl)-3,6-CBZ (**4**) and bis-(*p*-H-calix-triisopropyl)-2,7-CBZ (**5**) in various solvents.

Figure S15. Steady-state emission spectra of bis-(*p*-H-calix-triisopropyl)-3,6-CBZ (**4**) and bis-(*p*-H-calix-triisopropyl)-2,7-CBZ (**5**) in various solvents.

Figure S16. Emission spectra of bis-(*p*-H-calix-triisopropyl)-3,6-CBZ (**4**) and bis-(*p*-H-calix-triisopropyl)-2,7-CBZ (**5**) upon continuous irradiation.

Figure S17. UV-Vis spectra of fullerenes C<sub>60</sub> and C<sub>70</sub>.

Figure S18. Job plot of complex formation between bis-(*p*-H-calix-triisopropyl)-2,7-CBZ (**5**) and C<sub>60</sub>/C<sub>70</sub>.

Figure S19. VT-NMR of bis-(*p*-H-calix-triisopropyl)-3,6-CBZ (**4**) at various temperatures.

Figure S20. VT-NMR of equimolar amounts of bis-(*p*-H-calix-triisopropyl)-3,6-CBZ (**4**) and fullerene C<sub>60</sub>.

Figure S21. VT-NMR of equimolar amounts of bis-(*p*-H-calix-triisopropyl)-3,6-CBZ (**4**) and fullerene C<sub>70</sub>.

Figure S22. Stacked <sup>1</sup>H NMR spectra of **4**, C<sub>60</sub>@**4**, and C<sub>70</sub>@**4** at -10 °C.

## Synthesis and Structural Characterization Data of Calixarene-mono-iodo Derivative

Calix[4]arene-tripropyl-mono-iodo derivative **1** was synthesized via selective mono-iodination of 25-hydroxy-26,27,28-tripropoxycalix[4]arene [61] by an adapted synthetic procedure [38]. *p*-*tert*-Butyl-calix[4]arene [62] and *p*-H-calix[4]arene [63] were obtained according to reported methods.

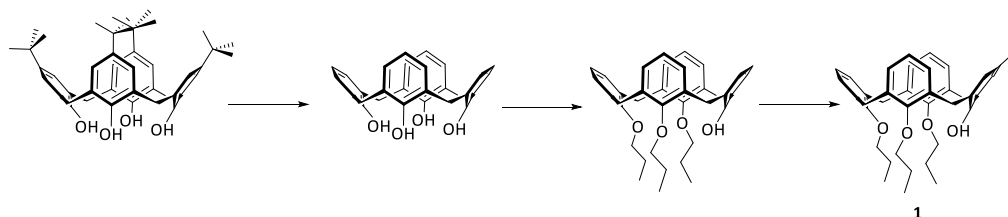

**Scheme S1.** Synthesis of calix[4]arene-tripropyl-mono-iodo derivative **1**.

**Compound 1:** To a solution of 25-hydroxy-26,27,28-tripropoxycalix[4]arene (950 mg, 1.725 mmol) in dry CH<sub>3</sub>CN (27 mL) at rt, *p*-toluenesulfonic acid (297.1 mg, 1.725 mmol) was added and allowed to react during 5 min. After that period, *N*-iodosuccinimide (427 mg (1.90 mmol) was introduced in the flask and the resulting yellow suspension was stirring under argon for 17 h at rt, having the TLC control (CHCl<sub>3</sub>:Hexane (1:1)) revealed the end of the reaction after that period. The solvent was removed in a rotary evaporator and the yellow residue was dissolved in CH<sub>2</sub>Cl<sub>2</sub>, washed with aqueous solution of NaHCO<sub>3</sub> 10% and water and dried. After solvent removal, the crude product was recrystallised from CH<sub>2</sub>Cl<sub>2</sub>:MeOH, affording 818.2 mg (70%) of **1** as a white solid. *m.p.*: 187–190 °C (*m.p.* lit.[64]: 172.0–172.5 °C);  $\nu_{\text{max}}/\text{cm}^{-1}$  (KBr) 3530, 3060, 2963, 2921, 2871, 1588, 1459, 1385, 1292, 1248, 1200, 1158, 1085, 1043, 1005, 963, 908, 845, 799, 762, 626, 592, 554;  $\delta_{\text{H}}$  (CDCl<sub>3</sub>, 400.130 MHz) 0.92 (t, 3H, -O-CH<sub>2</sub>-CH<sub>2</sub>-CH<sub>3</sub>, *J* = 7.5 Hz), 1.11 (t, 6H, -O-CH<sub>2</sub>-CH<sub>2</sub>-CH<sub>3</sub>, *J* = 7.4 Hz), 1.82–1.96 (m, 4H, -O-CH<sub>2</sub>-CH<sub>2</sub>-CH<sub>3</sub>), 2.19–2.29 (m, 2H, -O-CH<sub>2</sub>-CH<sub>2</sub>-CH<sub>3</sub>), 3.21 (4H, d, ArCH<sub>2eq</sub>Ar, *J*=13.2 Hz), 3.23 (4H, d, ArCH<sub>2eq</sub>Ar, *J*=13.6 Hz), 3.72 (4H, t, -O-CH<sub>2</sub>-CH<sub>2</sub>-CH<sub>3</sub>, *J* = 6.7 Hz), 3.82 (t, 2H, -O-CH<sub>2</sub>-CH<sub>2</sub>-CH<sub>3</sub>, *J*=8.4 Hz), 4.30 (d, 4H, ArCH<sub>2ax</sub>Ar, *J*=13.8 Hz), 4.39 (d, 4H, ArCH<sub>2ax</sub>Ar, *J*=13.1 Hz), 4.86 (s, 1H, ArOH), 6.31–6.49 (m, 6H, ArH), 6.98 (t, 1H, ArH, *J* = 7.4 Hz), 7.17 (d, 2H, ArH, *J* = 7.4 Hz), 7.40 (s, 2H, ArH).

## Structural Characterization Data of Calixarene-Carbazole Conjugates

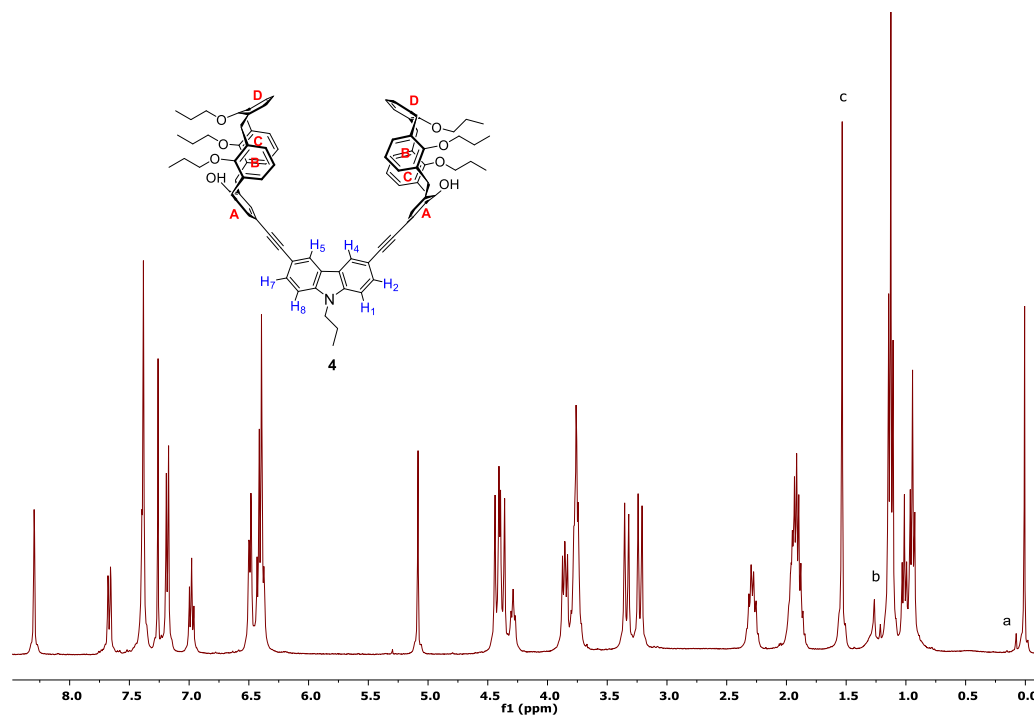

**Figure S1.**  $^1\text{H}$  NMR spectrum of bis-(*p*-H-calix-triisopropyl)-3,6-CBZ (**4**) in  $\text{CDCl}_3$  (400 MHz, 25 °C) [65]; <sup>a</sup>silicone grease, <sup>b</sup>apiezon type grease, <sup>c</sup>water.

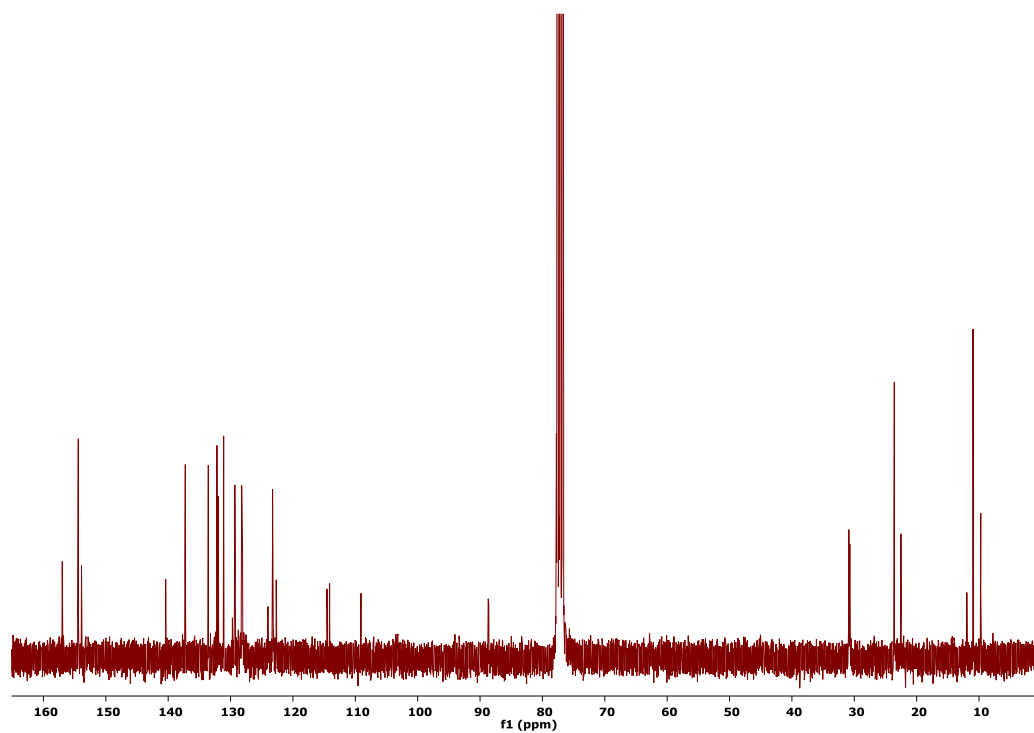

**Figure S2.**  $^{13}\text{C}$  NMR spectrum of bis-(*p*-H-calix-triisopropyl)-3,6-CBZ (**4**) in  $\text{CDCl}_3$  (75 MHz, 25 °C) [65].

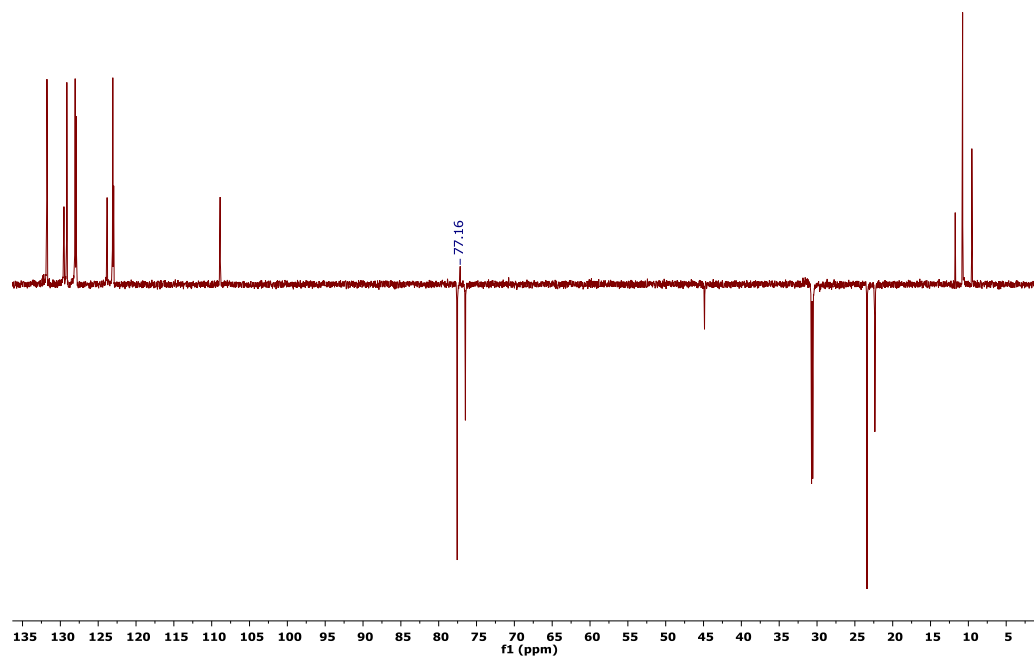

Figure S3.  $^{13}\text{C}$  DEPT 135 NMR spectrum of bis-(*p*-H-calix-trirop)-3,6-CBZ (**4**) in  $\text{CDCl}_3$  (75 MHz, 25 °C) [65].

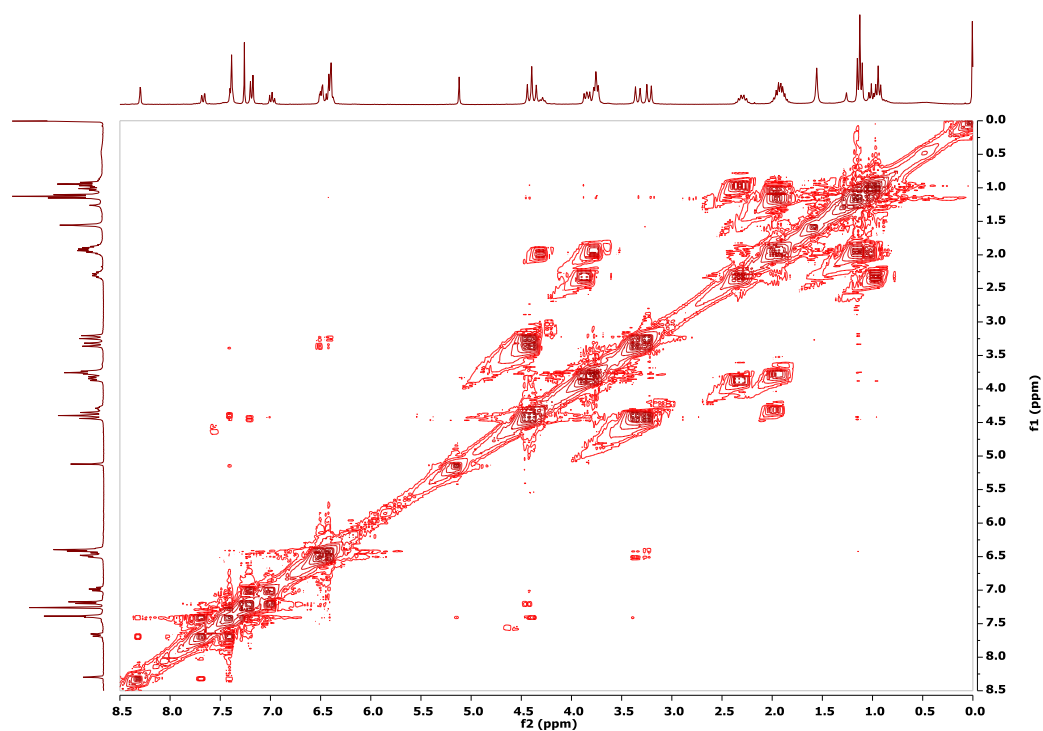

Figure S4.  $^1\text{H}$ - $^1\text{H}$  COSY NMR spectrum of bis-(*p*-H-calix-trirop)-3,6-CBZ (**4**) in  $\text{CDCl}_3$  (400 MHz, 25 °C) [65].

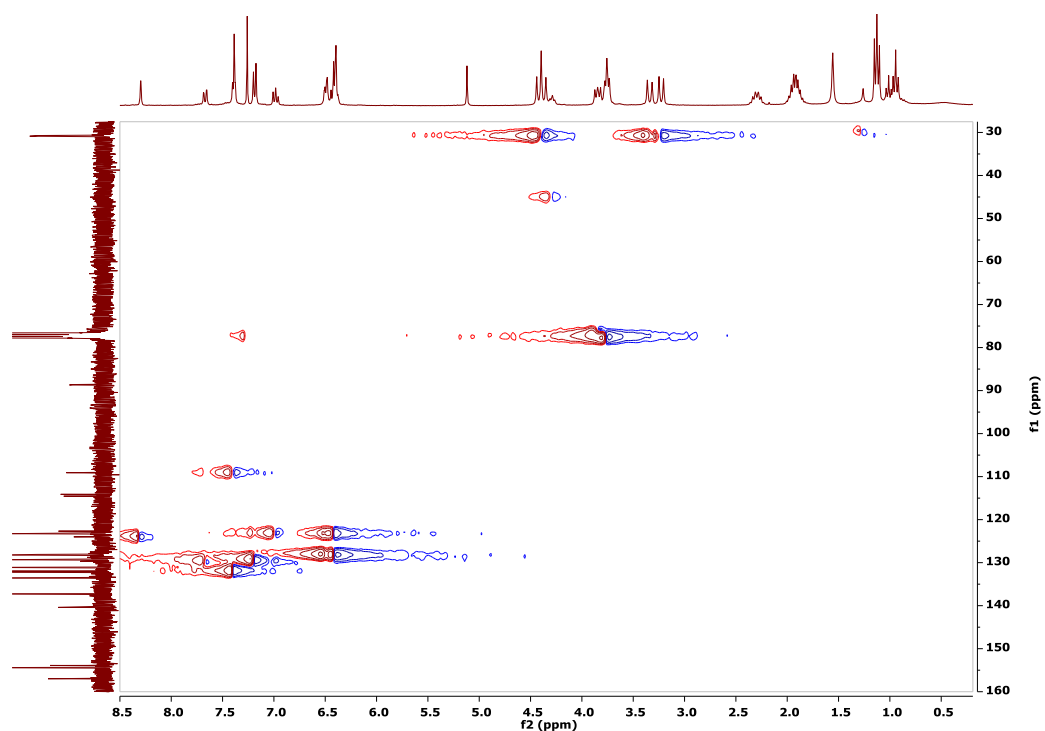

Figure S5.  $^1\text{H}$ - $^{13}\text{C}$  HSQC NMR spectrum of bis-(*p*-H-calix-trirop)-3,6-CBZ (**4**) in  $\text{CDCl}_3$  (400/75 MHz, 25 °C) [65].

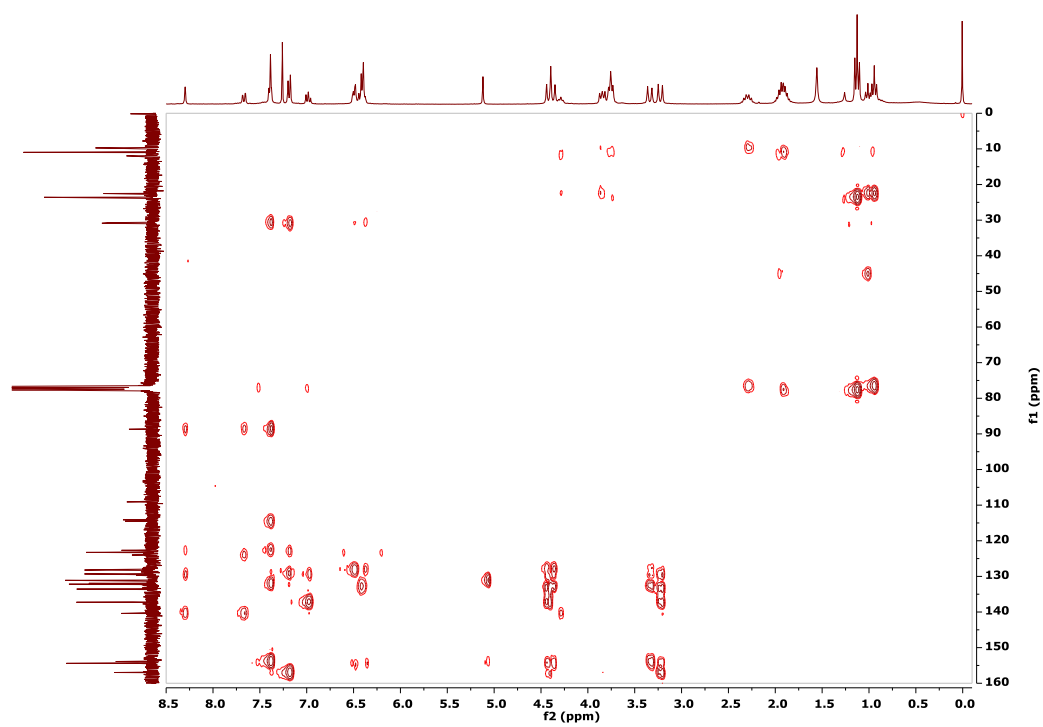

Figure S6.  $^1\text{H}$ - $^{13}\text{C}$  HMBC NMR spectrum of bis-(*p*-H-calix-trirop)-3,6-CBZ (**4**) in  $\text{CDCl}_3$  (400/75 MHz, 25 °C) [65].

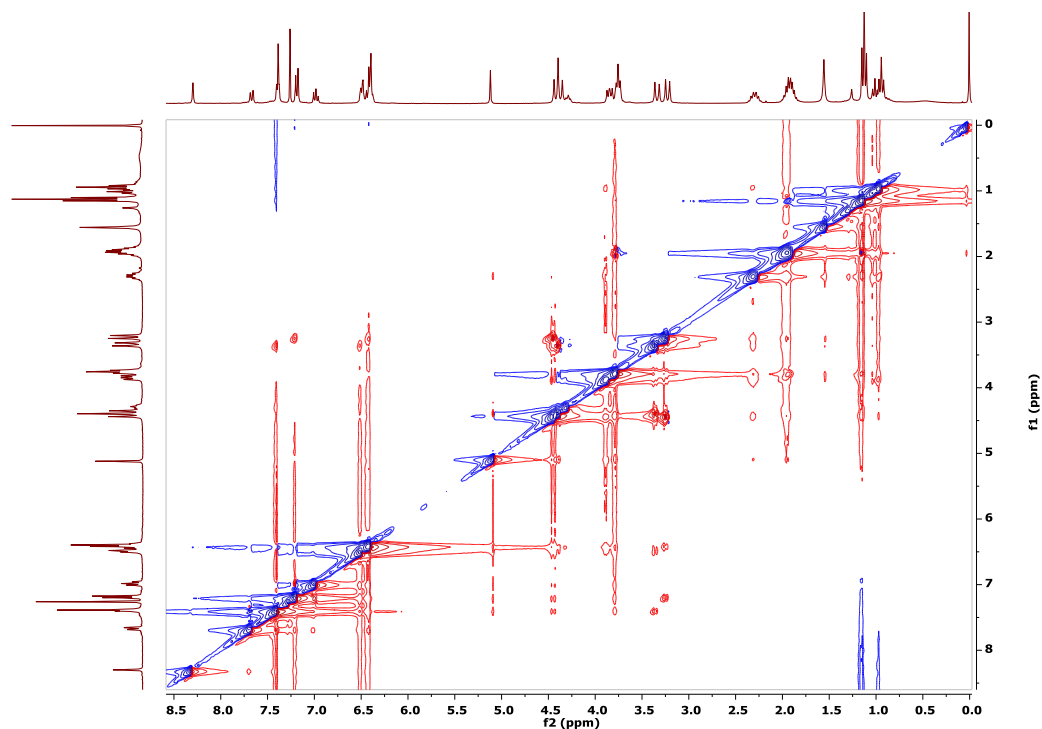

**Figure S7.** NOESY NMR spectrum of bis-(*p*-H-calix-trirop)-3,6-CBZ (**4**) in CDCl<sub>3</sub> (400 MHz, 25 °C) [65].

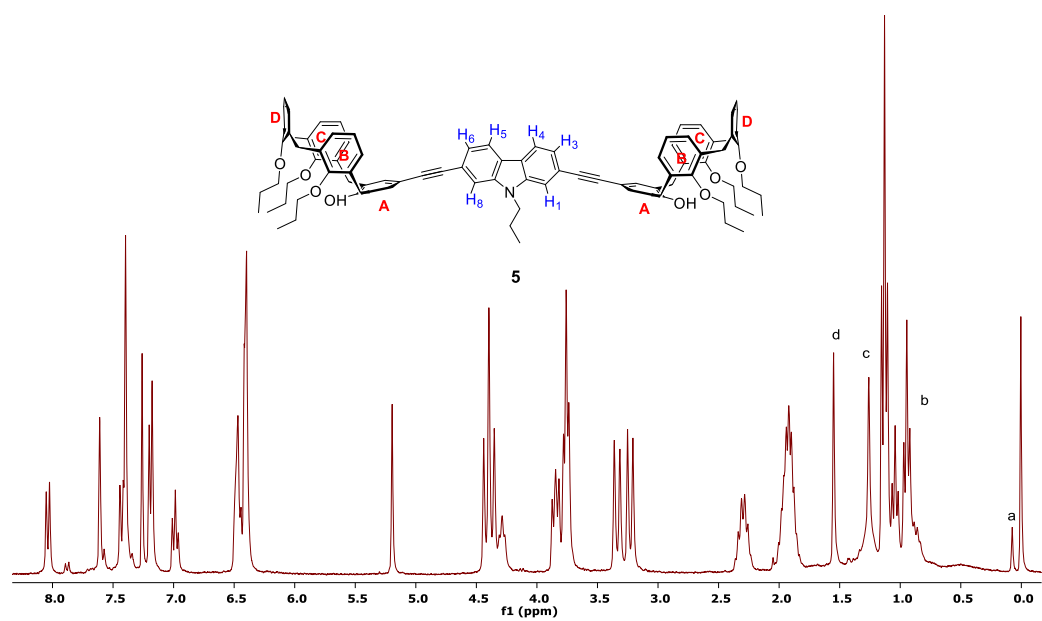

**Figure S8.** <sup>1</sup>H NMR spectrum of bis-(*p*-H-calix-trirop)-2,7-CBZ (**5**) in CDCl<sub>3</sub> (400 MHz, 25 °C) [65]; <sup>a</sup>silicone grease, <sup>b,c</sup>apieton type grease, <sup>d</sup>water.

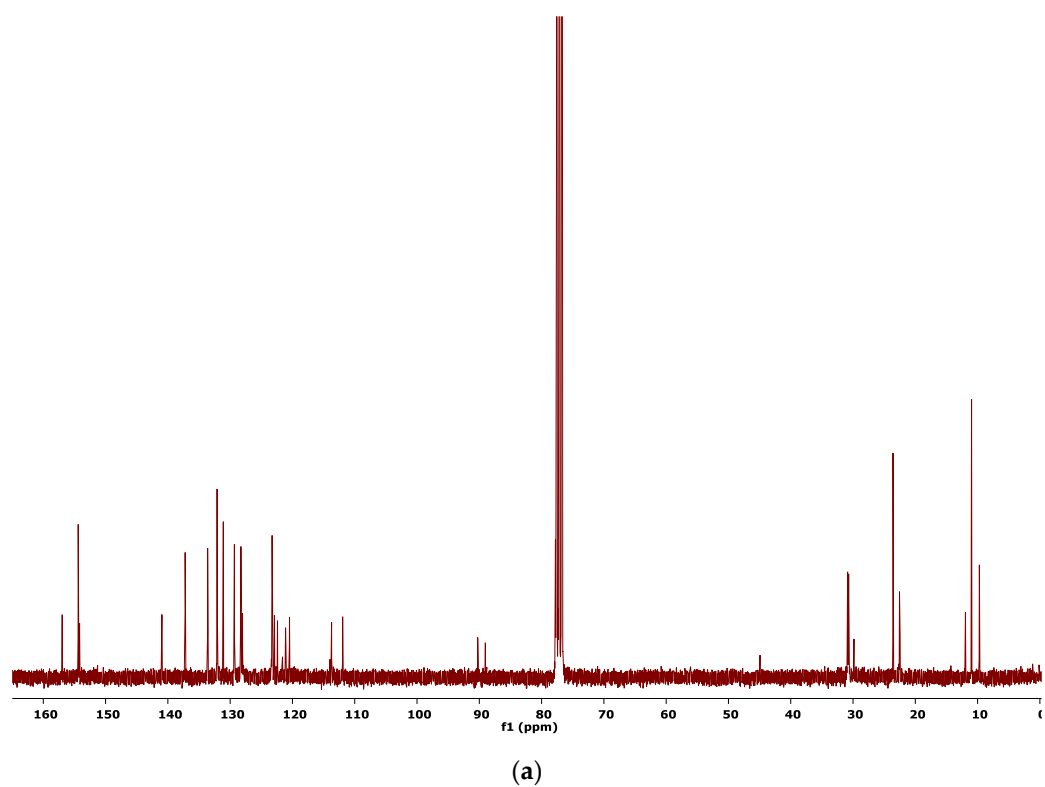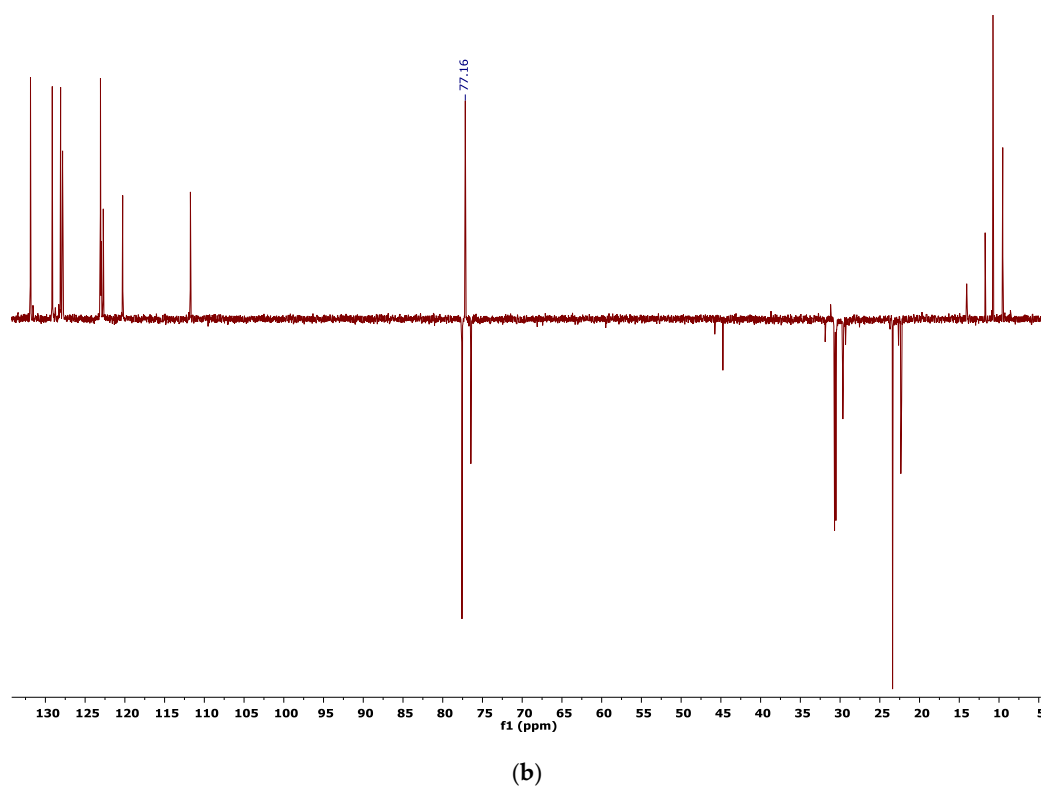

**Figure S9.**  $^{13}\text{C}$  NMR (a) and  $^{13}\text{C}$  DEPT 135 NMR (b) spectra of bis-(*p*-H-calix-triisopropyl)-2,7-CBZ (5) in  $\text{CDCl}_3$  (75 MHz, 25  $^\circ\text{C}$ ) [65].

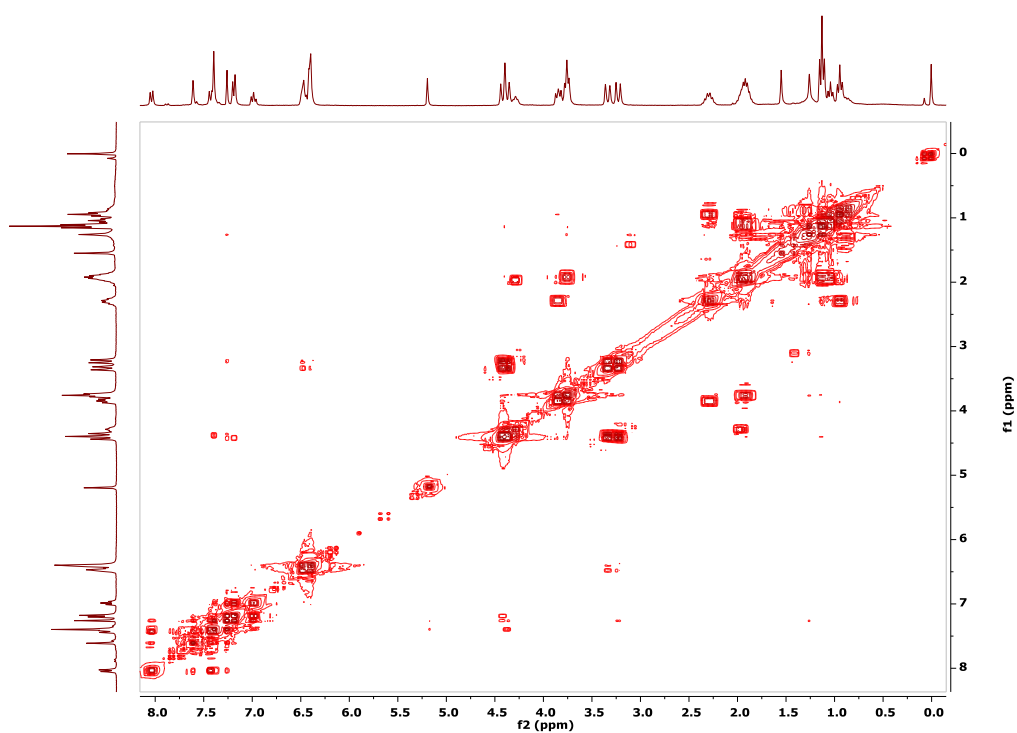

Figure S10.  $^1\text{H}$ - $^1\text{H}$  COSY NMR spectrum of bis-(*p*-H-calix-trirop)-2,7-CBZ (5) in  $\text{CDCl}_3$  (300 MHz, 25 °C) [65].

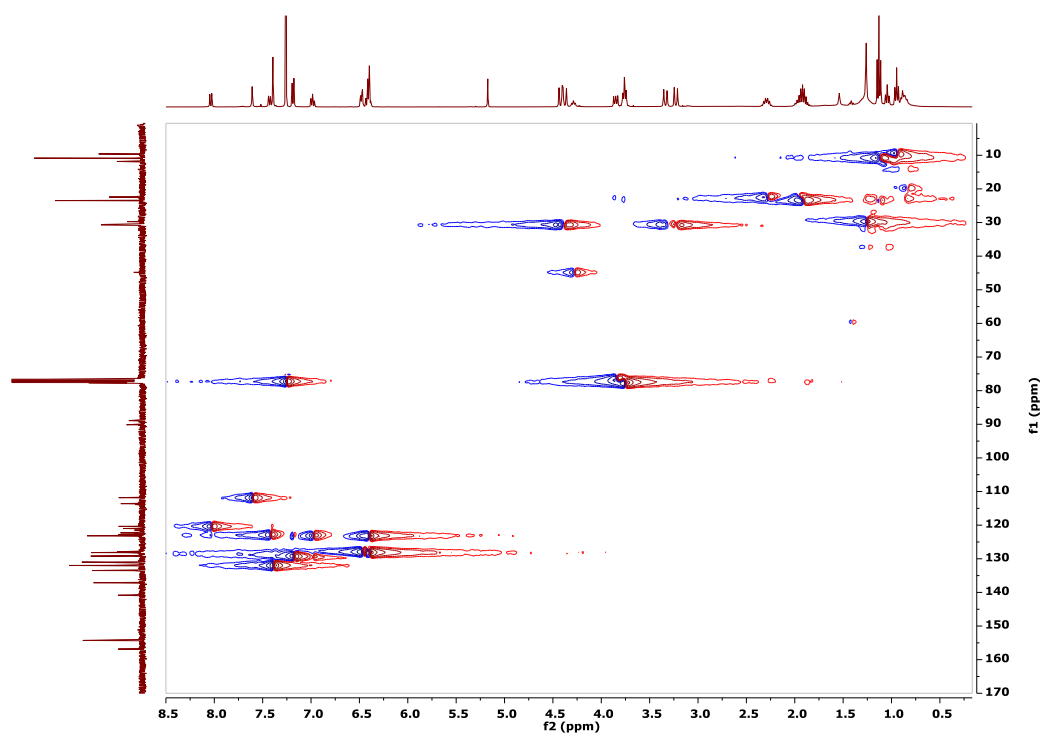

Figure S11.  $^1\text{H}$ - $^{13}\text{C}$  HSQC NMR spectrum of bis-(*p*-H-calix-trirop)-2,7-CBZ (5) in  $\text{CDCl}_3$  (300/75 MHz, 25 °C) [65].



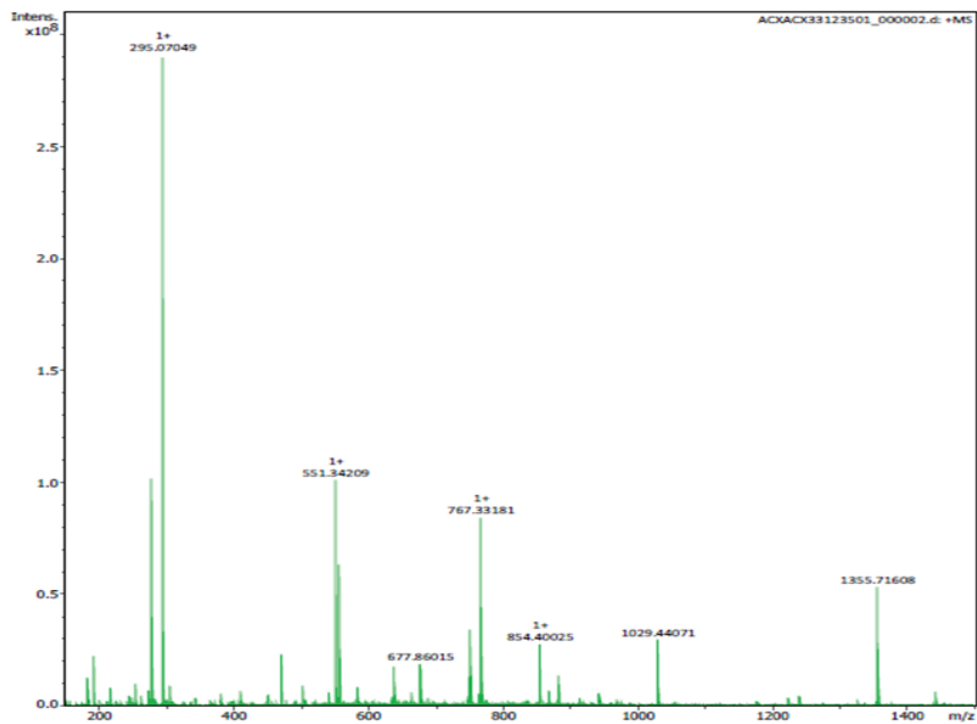

(a)

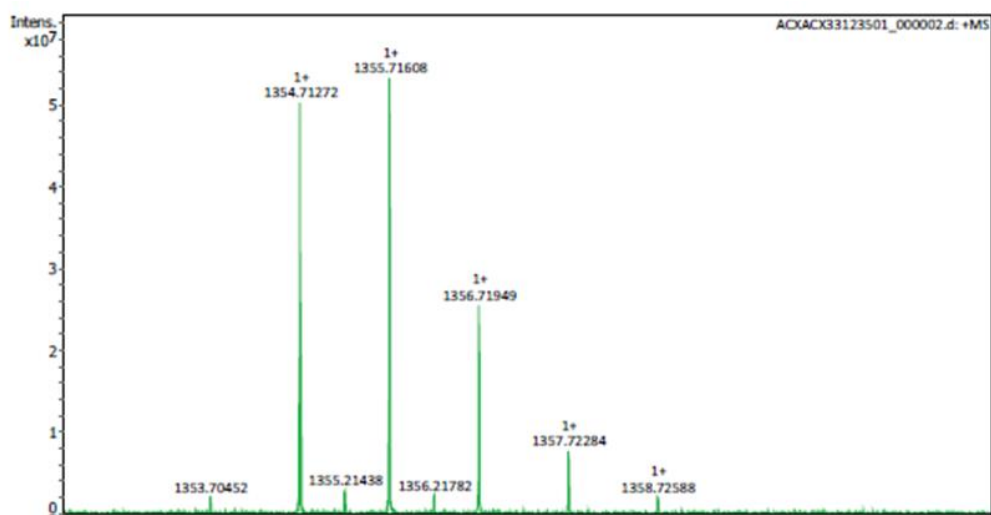

(b)

**Figure S12.** Full ESI-HRMS spectrum of bis-(*p*-H-calix-trirop)-3,6-CBZ (**4**) (a); ESI-HRMS spectrum of the molecular ion region (b).

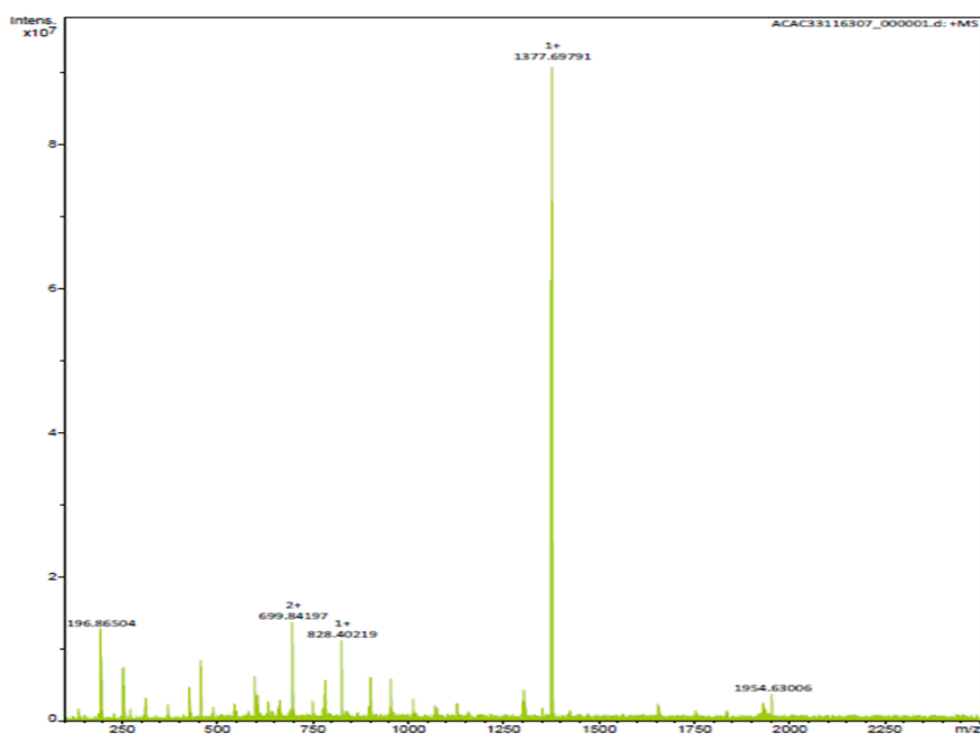

(a)

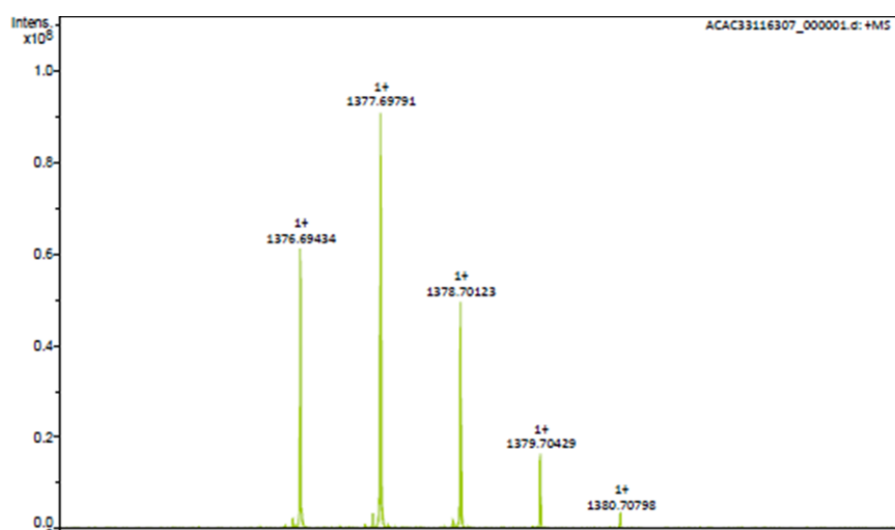

(b)

**Figure S13.** Full ESI-HRMS spectrum of bis-(*p*-H-calix-tri-*n*-prop)-2,7-CBZ (5) (a); ESI-HRMS spectrum of the molecular ion region (b).

### Photophysical Properties

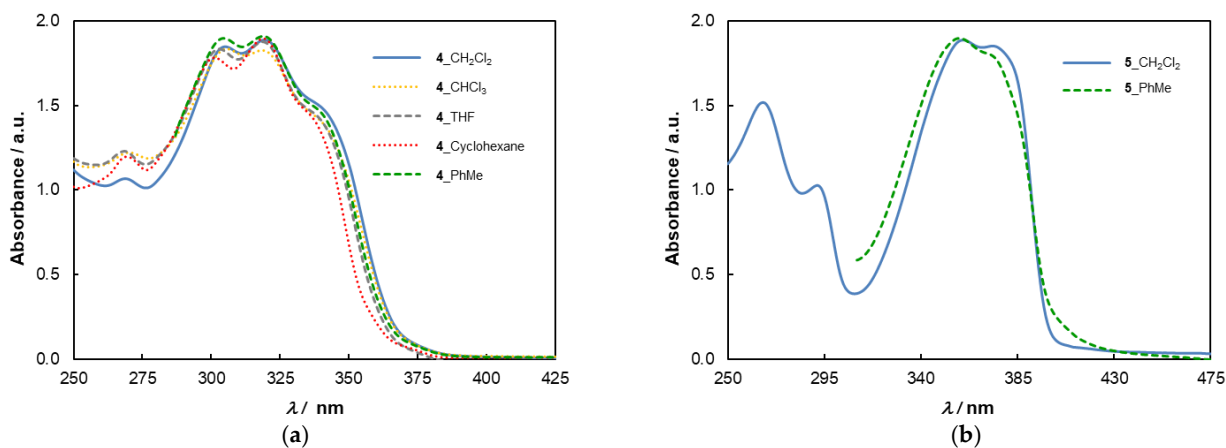

**Figure S14.** UV-Vis spectra of bis-(*p*-H-calix-triisopropyl)-3,6-CBZ (4) (a) and bis-(*p*-H-calix-triisopropyl)-2,7-CBZ (5) (b) in different solvents ( $2.5 \times 10^{-5}$  M).

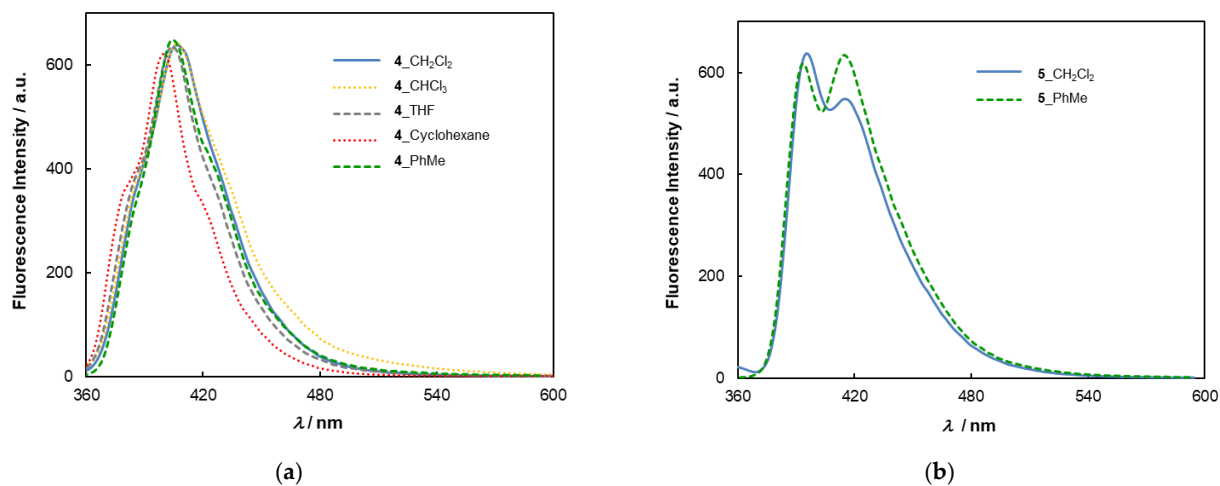

**Figure S15.** Emission spectra of bis-(*p*-H-calix-triisopropyl)-3,6-CBZ (4) (a) and bis-(*p*-H-calix-triisopropyl)-2,7-CBZ (5) (b) in different solvents ( $6.0 \times 10^{-7}$  M).

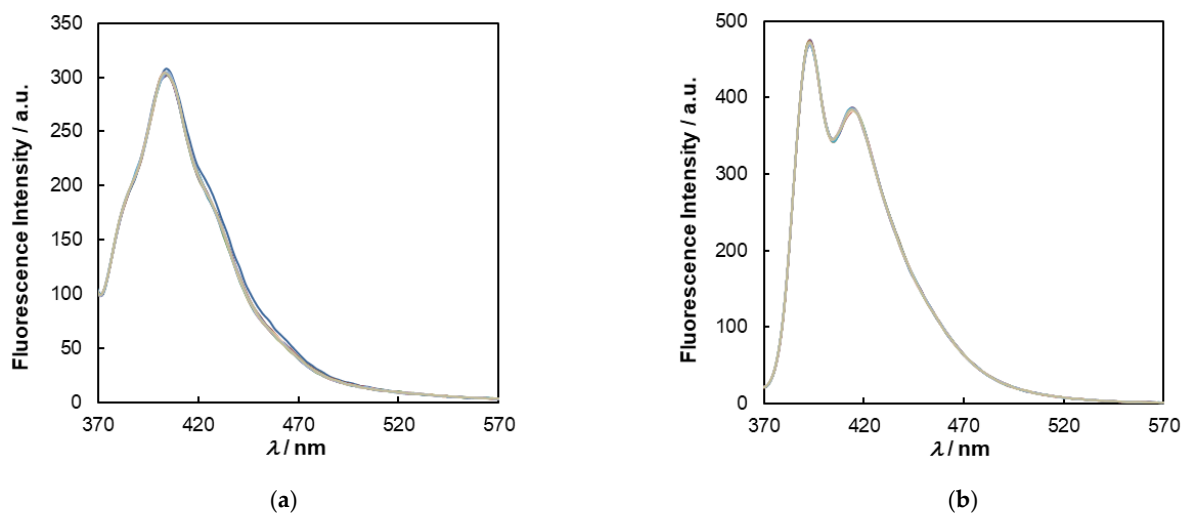

**Figure S16.** Emission spectra of bis-(*p*-H-calix-triisopropyl)-3,6-CBZ (**4**) (a) and bis-(*p*-H-calix-triisopropyl)-2,7-CBZ (**5**) (b), both in  $6.0 \times 10^{-7}$  M in toluene, upon continuous irradiation for 20 min, under the same experimental conditions carried out on titration experiments ( $\lambda_{\text{exc}} = 357$  nm).

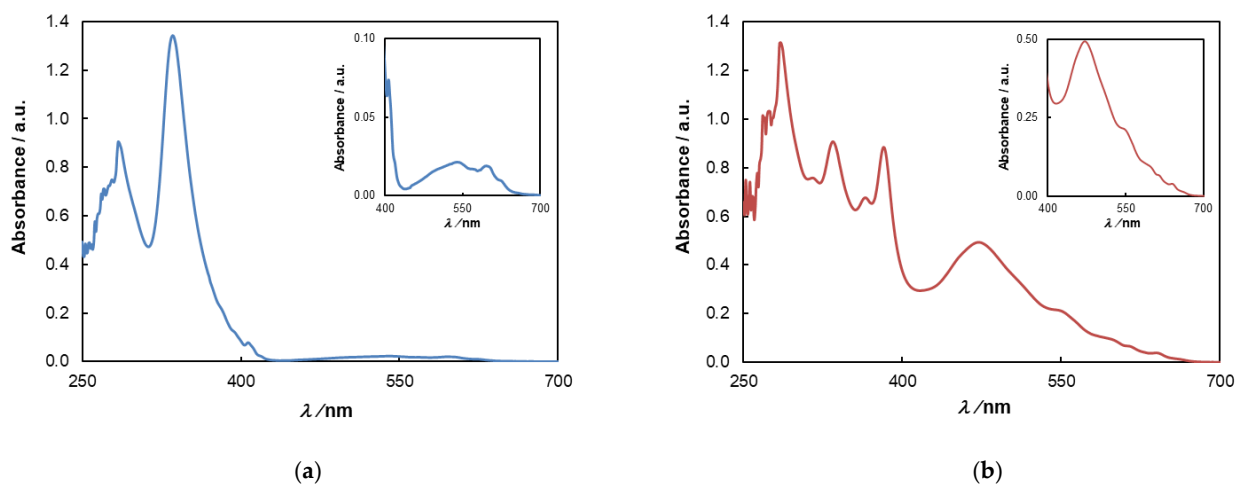

**Figure S17.** UV-Vis spectra of fullerenes  $\text{C}_{60}$  (a) and  $\text{C}_{70}$  (b) in toluene ( $2.21 \times 10^{-5}$  M); insets: amplification of the region between 400–700 nm.

## Job plots

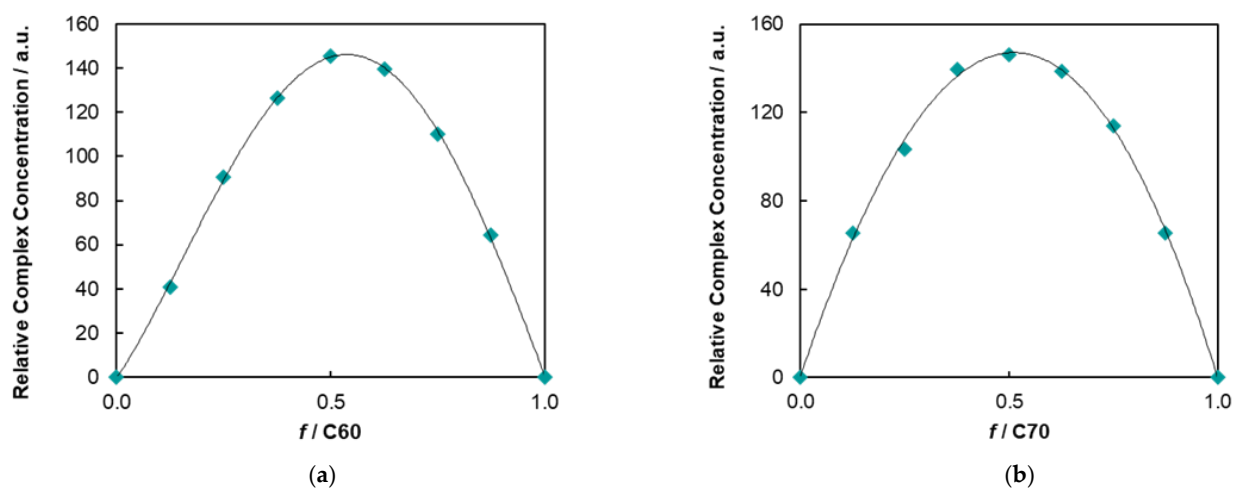

**Figure S18.** Job plot of complex formation between bis-(*p*-H-calix-triisopropyl)-2,7-CBZ (**5**) and  $C_{60}$  (a)/ $C_{70}$  (b) in toluene (at constant  $6.0 \times 10^{-7}$  M total concentration) as obtained from changes in fluorescence ( $\lambda_{exc} = 357$  nm).

### Variable-Temperature $^1\text{H}$ NMR spectra

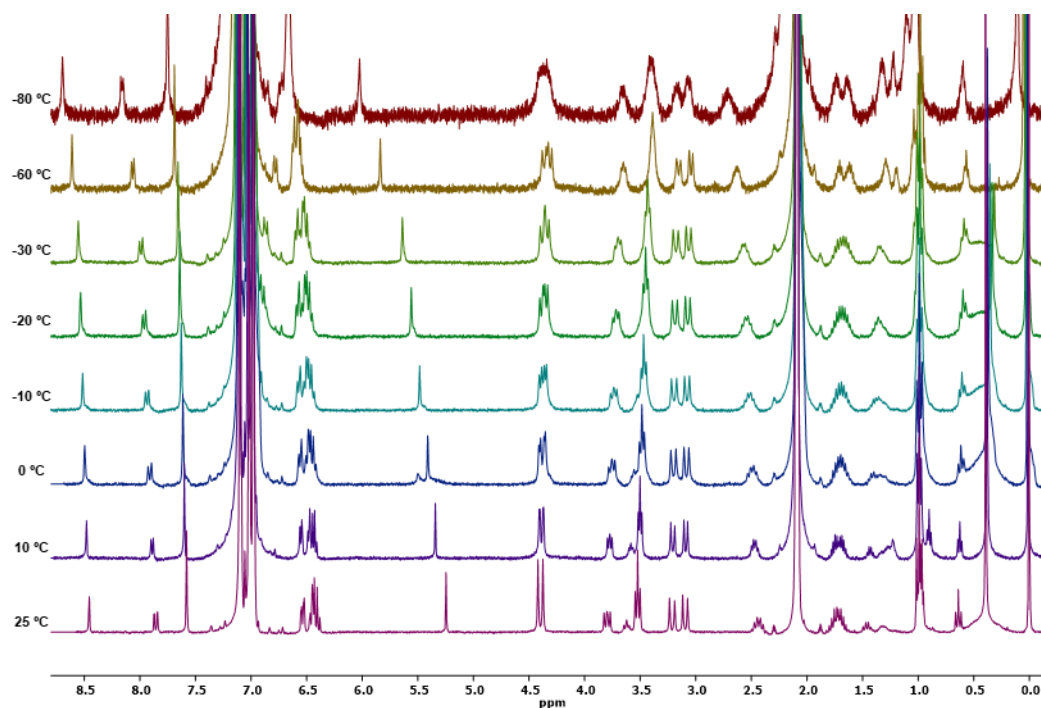

**Figure S19.** VT-NMR of bis-(*p*-H-calix-trirop)-3,6-CBZ (4) at various temperatures (400 MHz, toluene- $d_8$ ) [65].

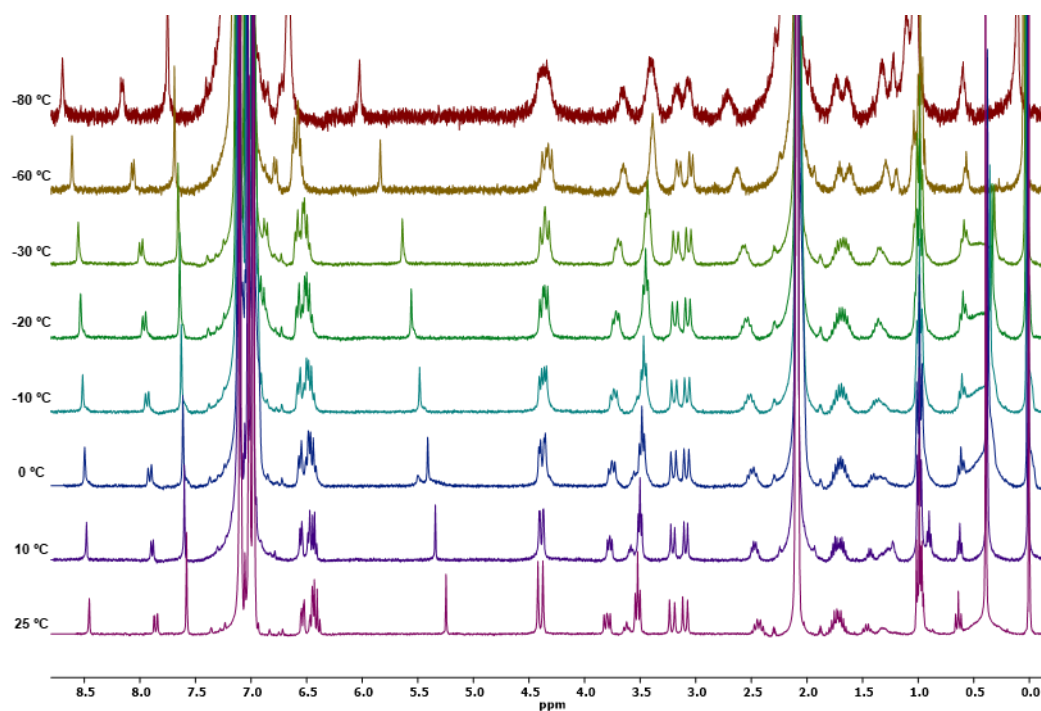

**Figure S20.** VT-NMR of equimolar amounts of bis-(*p*-H-calix-trirop)-3,6-CBZ (4) and fullerene  $\text{C}_{60}$  at various temperatures (400 MHz, toluene- $d_8$ ) [65].

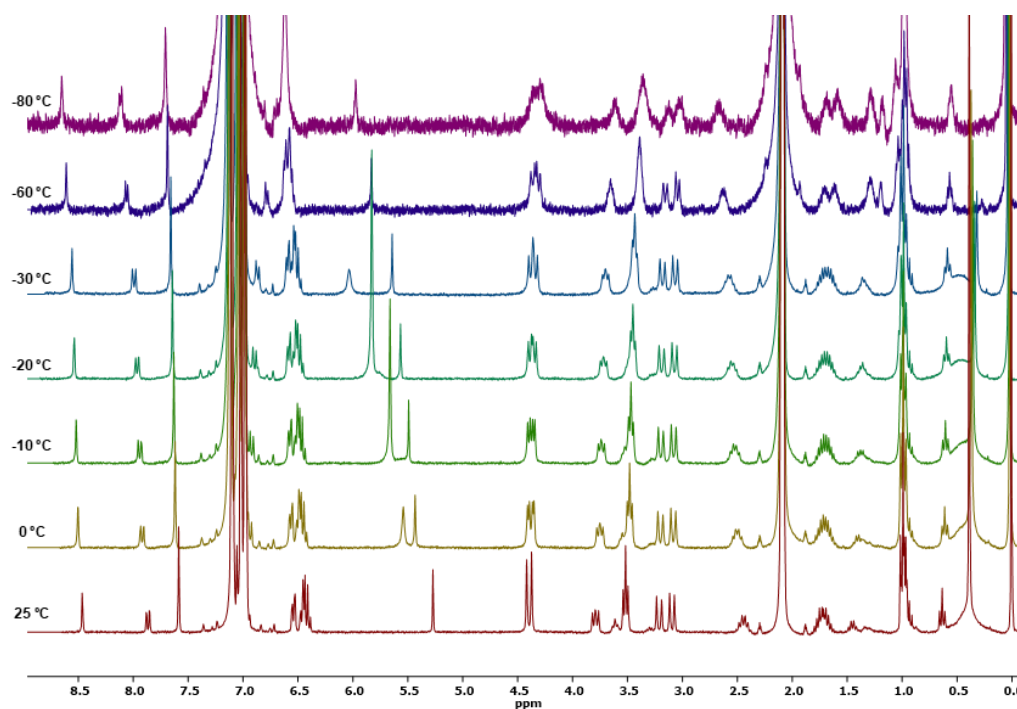

**Figure S21.** VT-NMR of equimolar amounts of bis-(*p*-H-calix-trirop)-3,6-CBZ (**4**) and fullerene  $C_{70}$  at various temperatures (400 MHz, toluene- $d_8$ ) [65].

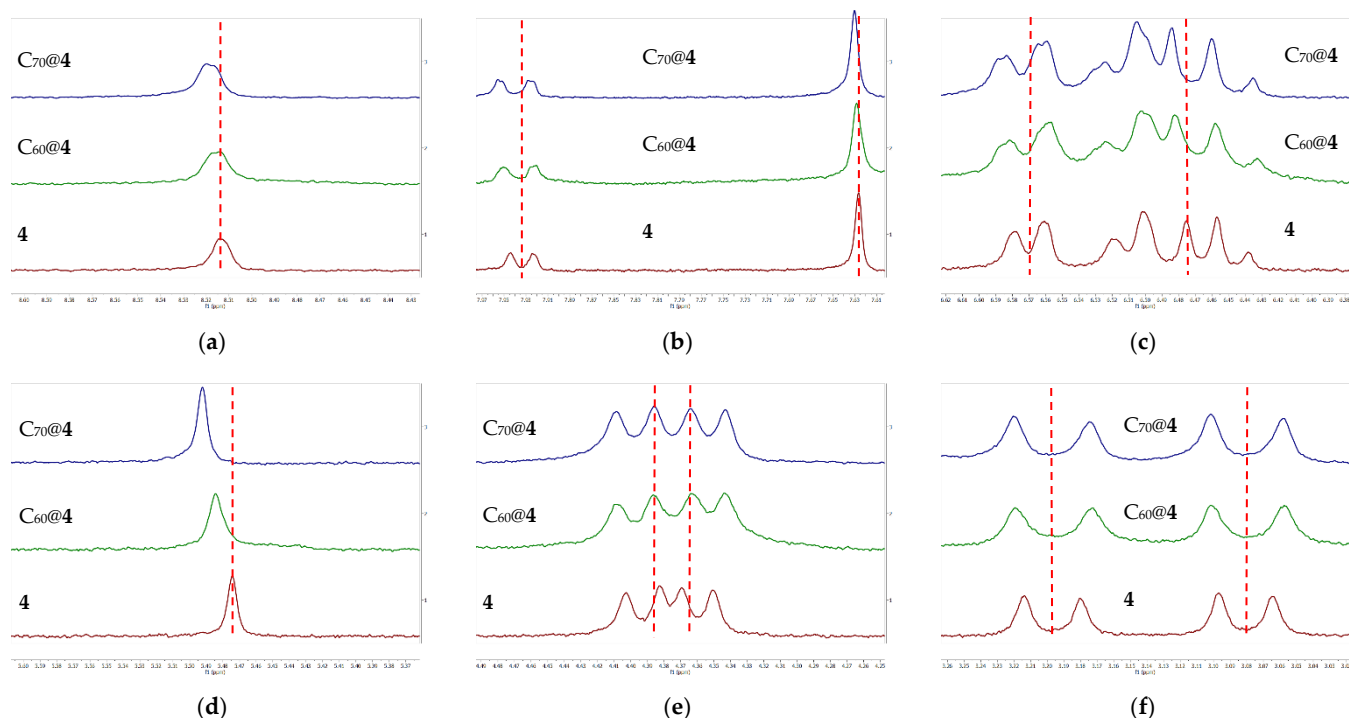

**Figure S22.** Stacked  $^1H$  NMR spectra of **4**,  $C_{60}@4$ , and  $C_{70}@4$  at  $-10\text{ }^\circ\text{C}$ , showing complexation-induced shifts (CIS) at several representative regions (400 MHz, toluene- $d_8$ ): (a)  $ArCBZH(4,5)$ ; (b)  $ArCBZH(2,7)$  and  $ArCalixH(ring\ A)$ ; (c)  $ArCalixH(rings\ B,\ C)$ ; (d)  $ArOH$ ; (e)  $ArCH_2(ax)Ar$ ; (f)  $ArCH_2(eq)Ar$  [65].

## References

38. Bovonsombat, P.; Leykajarakul, J.; Khan, C.; Pla-on, K.; Krause, M. M.; Khanthapura, P.; Ali, R.; Doowa, N. Regioselective iodination of phenol and analogues using *N*-iodosuccinimide and *p*-toluenesulfonic acid. *Tetrahedron Lett.* **2009**, *50*, 2664–2667. <https://doi.org/10.1016/j.tetlet.2009.03.128>
61. Dondoni, A.; Ghiglione, C.; Marra, A.; Scoconi, M. Synthesis of calix[4]arenylvinylene and calix[4]arenylphenylene oligomers by Stille and Suzuki cross-coupling reactions. *J. Org. Chem.* **1998**, *63*, 9535–9539. <https://doi.org/10.1021/jo980868w>
62. Gutsche, C.D.; Iqbal, M. *para-tert*-Butylcalix[4]arene. *Org. Synth.* **1990**, *68*, 234–237. <https://doi.org/10.15227/orgsyn.068.0234>
63. Gutsche, C.D.; Lin, L.G. The Synthesis of Functionalized Calixarenes. *Tetrahedron* **1986**, *42*, 1633–1640. [https://doi.org/10.1016/S0040-4020\(01\)87580-3](https://doi.org/10.1016/S0040-4020(01)87580-3)
64. Gunji, A.; Takahashi, K. Selective and Efficient Iodination of the *p*-Positions of Calix[4]arene Derivatives. *Synth. Commun.* **1998**, *28*, 3933–3941. <https://doi.org/10.1080/00397919808004951>
65. All NMR spectra were post-processed by MestReNova, version: 14.1.2-25024; Mestrelab Research, S.L., 2020
